# Supplementary material
Source: publisher figshare collection journal article supplement (https://frontiersin.figshare.com/ndownloader/files/13356254)
Supplement: Supplementary file 1 [file 13356254]

## Sheet: Sheet1
Supplementary Table S1. Field Data. Results are presented as the mean ± one standard deviation of the mean of triplicate samples, unless otherwise noted.
	Long Island	New Jersey Coast	Narragansett Bay	Wood's Hole Harbor	Buzzard's Bay
Latitude	40°53'43.98"N	39°24'43.50"N	41°17'12.12"N	41°31'24.60"N	41°32'38.28"N
Longitude	71°22'49.92"W	73°14'56.64"W	71°30'11.64"W	70°40'40.80"W	70°40'8.46"W
Depth	35 m (Deep chlorophyll max)	16 m (Deep chlorophyll max)	10 m (Deep chlorophyll max)	~5 m	~5 m
Temperature (°C)	11.2	22.7	21.5	22	22
Salinity	32.8	32	32	24.7	24.4
Inorganic poly-P hydrolysis (nmol P L-1 hr-1)	3.8 ± 1.4 (n=8)	17.3 ± 1.8 (n=8)	6.7 ± 1.2 (n=8)	17.5 ± 1.6 (n=8)	19.3 ± 1.7 (n=8)
MUF-P hydrolysis (nmol P L-1 hr-1)	1.4 ± 0.3	7.8 ± 1.8	4.4 ± 0.3	10.0 ± 0.9	50.6 ± 6.1
Inorganic poly-P hydrolysis (nmol P μg chl-1 hr-1)	6.8 ± 2.6 (n=8)	5.6 ± 0.6 (n=8)	6.1 ± 1.1 (n=8)	5.7 ± 0.5 (n=8)	7.7 ± 0.7 (n=8)
MUF-P hydrolysis (nmol P μg chl-1 hr-1)	2.5 ± 0.5	2.6 ± 0.6	4.0 ± 0.3	3.3 ± 0.3	20.1 ± 2.4
Soluble reactive phosphorus (nmol L-1)	874 ± 89	147 ± 15	710 ± 99	819 ± 64	890 ± 2
Chlorophyll (μg L-1)	0.56 ± 0.07	3.06 ± 0.90	1.10 ± 0.02	3.05 ± 0.32	2.51 ± 0.04
Bacterial abundance (105 cells mL-1)	7.12 ± 0.51	37.9 ± 0.2	27.7 ± 0.1	9.72 ± 0.51	12.3 ± 0.0
Total phytoplankton (104 cells mL-1)	1.59 ± 0.60	22.0 ± 4.0	13.1 ± 0.9	2.9 ± 0.2	0.99 ± 0.31
Synechococcus spp. (104 cells mL-1)	1.39 ± 0.52	15.5 ± 2.8	9.99 ± 0.73	1.55 ± 0.10	0.37 ± 0.13
Picoeukaryotic phytoplankton (103 cells mL-1)	0.44 ± 0.17	35.4 ± 6.4	12.1 ± 0.4	4.90 ± 1.91	2.42 ± 0.70
Nanoeukaryotic phytoplankton (103 cells mL-1)	1.05 ± 0.42	19.5 ± 4.4	13.4 ± 0.8	5.38 ± 0.67	2.02 ± 0.66
Large eukaryotic phytoplankton (102 cells mL-1)	1.56 ± 0.89	0.78 ± 0.36	13.7 ± 1.3	9.59 ± 1.91	3.35 ± 1.35
Bacterial abundance : Total phytoplankton	45 ± 17	17 ± 3	21 ± 2	33 ± 3	125 ± 39
